# Supplementary material for: Sonocatalytic oxidative desulfurization of diesel oil using a novel BiVO4/FeMn LDH nanocomposite
Source: Royal Society of Chemistry journal article supplement (doi:10.1039/d3dt01080e), 2023-01-01
Supplement: d3dt01080e1.pdf [file d3dt01080e1.pdf]

## Sonocatalytic oxidative desulfurization of diesel oil by novel $\text{BiVO}_4/\text{FeMn}$ LDH nanocomposite

Asmaa. A. Abdelrahman<sup>a</sup>, Doaa. I. Osman<sup>b</sup>, Abdelrahman M. Rabie<sup>c,\*</sup>, Heba M.  
Salem<sup>a\*</sup>

<sup>a</sup> Refining Department, Egyptian Petroleum Research Institute, Nasr City, 11727, Egypt.

<sup>b</sup> Analysis and Evaluation Department, Egyptian Petroleum Research Institute, Nasr City, 11727, Egypt

<sup>c</sup> Petrochemicals Department, Egyptian Petroleum Research Institute, Nasr City, 11727, Egypt

\*Corresponding author. (Abdelrahman M. Rabie): abdo3040@yahoo.com

(Heba M. Salem): hebasalem84@yahoo.com

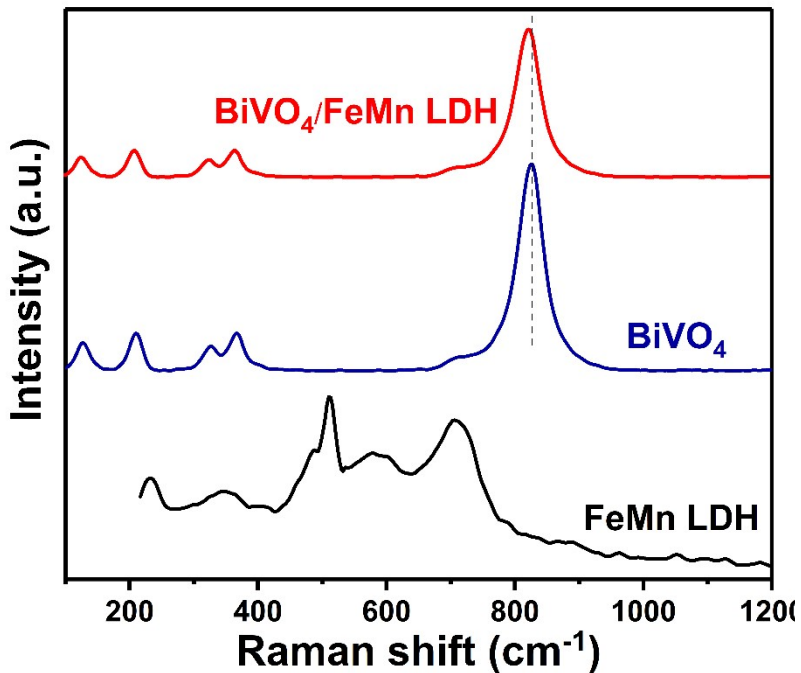

Fig. S1. Raman spectroscopy of the prepared materials

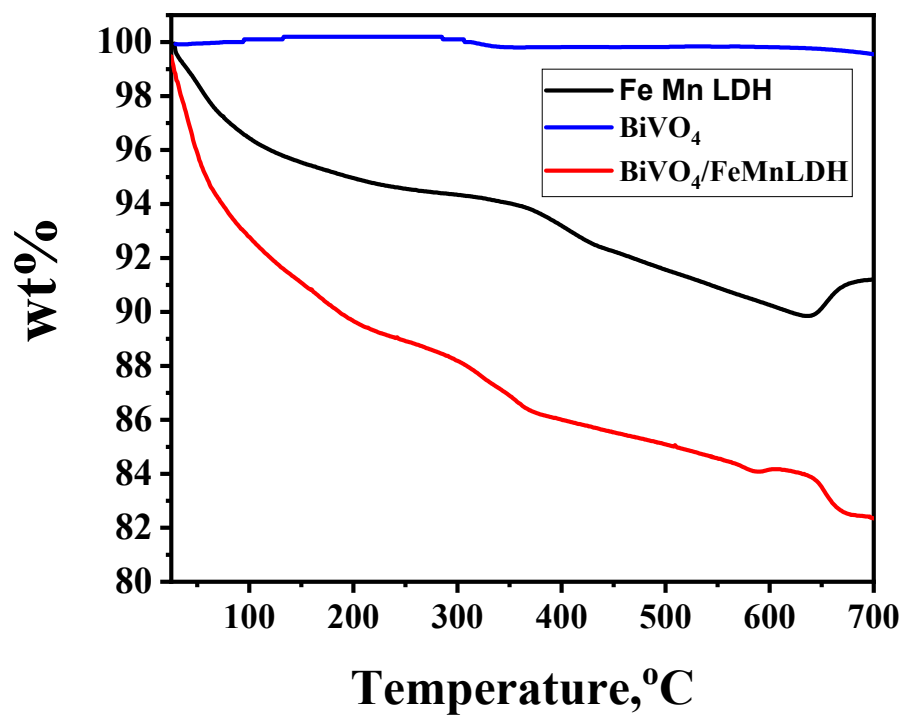

Fig. S2. TGA of the prepared materials
